# Supplementary material for: Normalization and microbial differential abundance strategies depend upon data characteristics
Source: PubMed Central journal article supplement (PMC5335496; doi:10.1186/s40168-017-0237-y), 2017-03-03
Supplement: 40168_2017_237_MOESM4_ESM.pdf [file 40168_2017_237_MOESM4_ESM.pdf]

**a**

OTU Table:

Relative Abundance Data:

Multinomial Template:

|      | Ocean_1 | Ocean_2 |
|------|---------|---------|
| OTU1 | 5       | 5       |
| OTU2 | 11      | 12      |
| OTU3 | 40      | 40      |

|      | Ocean_1 | Ocean_2 | Ocean_1/Ocean_2 |
|------|---------|---------|-----------------|
| OTU1 | 0.09    | 0.09    | 1.02            |
| OTU2 | 0.20    | 0.21    | 0.93            |
| OTU3 | 0.71    | 0.70    | 1.02            |

Original Approach:  
constant (20)  
applied to OTU1

|         | Ocean_1 | Ocean_2 |
|---------|---------|---------|
| OTU1-TP | 100     | 5       |
| OTU2    | 11      | 12      |
| OTU3    | 40      | 40      |

|          | Ocean_1 | Ocean_2 | Ocean_1/Ocean_2 |
|----------|---------|---------|-----------------|
| OTU1-TP  | 0.66    | 0.09    | 7.55            |
| OTU2-TN? | 0.07    | 0.21    | 0.35            |
| OTU3-TN? | 0.26    | 0.70    | 0.38            |

Balanced Approach:  
constant (20) applied  
to OTU1, and OTU1d  
(d=duplicate)

|          | Ocean_1 | Ocean_2 |
|----------|---------|---------|
| OTU1-TP  | 100     | 5       |
| OTU1d-TP | 5       | 100     |
| OTU2     | 11      | 12      |
| OTU3     | 40      | 40      |

|          | Ocean_1 | Ocean_2 | Ocean_1/Ocean_2 |
|----------|---------|---------|-----------------|
| OTU1-TP  | 0.64    | 0.03    | 20.12           |
| OTU1d-TP | 0.03    | 0.64    | 0.05            |
| OTU2-TN  | 0.07    | 0.07    | 0.92            |
| OTU3-TN  | 0.26    | 0.25    | 1.00            |

**b**

Multinomial Template/Environment

OTU table

Original Approach:

|      | Ocean_1 | Ocean_2 |
|------|---------|---------|
| OTU1 | 5       | 5       |
| OTU2 | 11      | 12      |
| OTU3 | 40      | 40      |

sample from multinomial →

|      | Ocean_1 | Ocean_2 |
|------|---------|---------|
| OTU1 | 100     | 5       |
| OTU2 | 11      | 12      |
| OTU3 | 40      | 40      |

Compositional Approach:

|      | Ocean_1 | Ocean_2 |
|------|---------|---------|
| OTU1 | 100     | 5       |
| OTU2 | 11      | 12      |
| OTU3 | 40      | 40      |

sample from multinomial →

|      | Ocean_1 | Ocean_2 |
|------|---------|---------|
| OTU1 | 43      | 5       |
| OTU2 | 2       | 12      |
| OTU3 | 11      | 40      |
