# Supplementary material for: Normalization and microbial differential abundance strategies depend upon data characteristics
Source: Springer Nature journal article supplement (doi:10.1186/s40168-017-0237-y), 2017-03-03

a

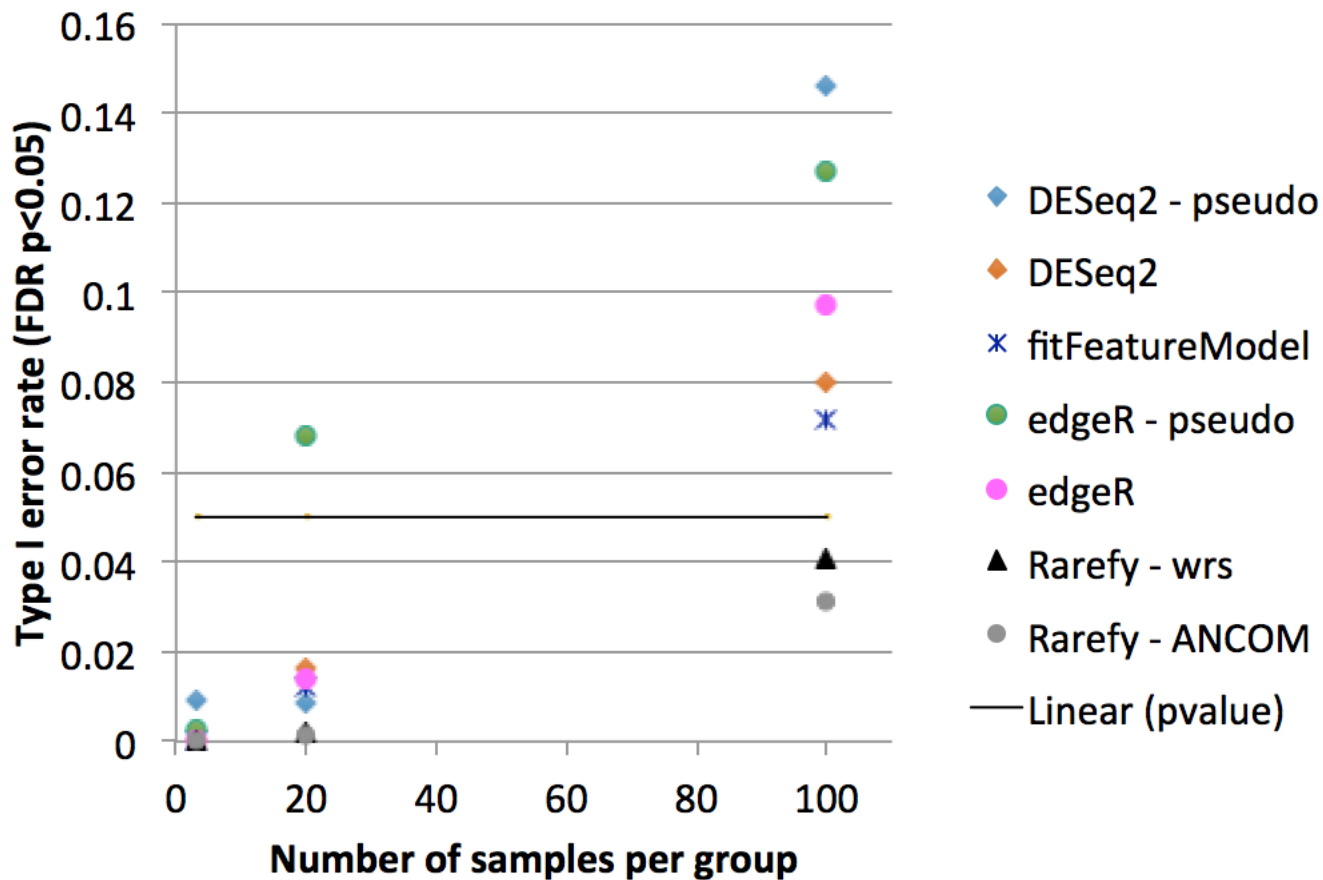

b

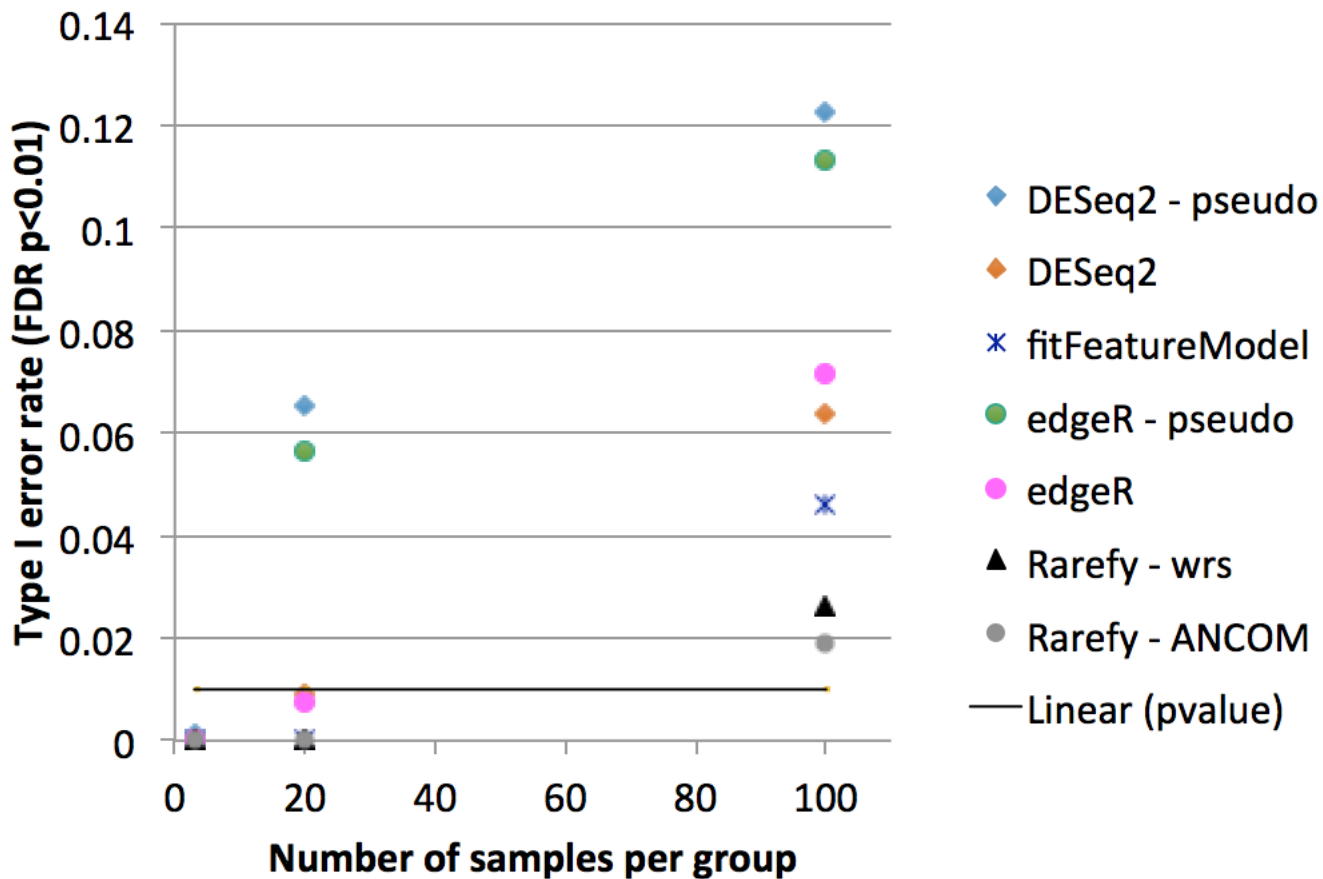

Supplement: 40168_2017_237_MOESM8_ESM.pdf [file 40168_2017_237_MOESM8_ESM.pdf]
